# Supplementary material for: In Pursuit of Stability Enhancement of a Prostate Cancer Targeting Antibody Derived from a Transgenic Animal Platform
Source: PubMed Central journal article supplement (PMC7298045; doi:10.1038/s41598-020-66636-z), 2020-06-16

**In Pursuit of Stability Enhancement of a Prostate Cancer Targeting Antibody  
Derived from a Transgenic Animal Platform**

*Sathya Venkataramani<sup>1</sup>, Robin Ernst<sup>1</sup>, Mehabaw Derebe<sup>1</sup>, Robert Wright<sup>1</sup>, Jessica Kopenhaver<sup>1</sup>,  
Steven Jacobs<sup>1</sup>, Sanjaya Singh<sup>1</sup> and Rajkumar Ganesan<sup>1\*</sup>*

*<sup>1</sup>Janssen Biotherapeutics, 1400 McKean Road, Spring House, PA 19477*

\*Correspondence

Rajkumar Ganesan  
Janssen Biotherapeutics  
1400 McKean Road,  
Spring House, PA 19477  
Ph: (215) 628-6880  
Email: [rganesa3@its.inj.com](mailto:rganesa3@its.inj.com)

## Supplementary information

**Figure S1:** (a) Sequence alignment of an anti-PSMA heavy chain (VH) with human germline IGHV4-39\*01 and its engineered variant. An unusual framework residue (Ile) at position 68 was re-engineered to Thr. (b) Relative positional frequency of the SHM using the abYsis portal. (c) Intrinsic properties characterization of anti-PSMA using Differential Scanning Fluorimetry (DSF). An improvement in both  $T_m$  and  $T_{agg}$  was observed for the engineered variant.

**Figure S2:** (a) Sequence alignment of an anti-DLL3 heavy chain (VH) with human germline IGHV3-13\*05 and the light chain (Vk) with human germline IGKV1-5\*03 and a series of engineered variants. Two unusual framework residues at position 85 (in the VH) and at position 84 (in VL) were re-engineered. (b) The composition of mutations in VH and Vk for the three engineered variants (c) Intrinsic properties characterization of an anti-DLL3 using Differential Scanning Fluorimetry (DSF). An improvement in both  $T_m$  and  $T_{agg}$  was observed for the engineered variant. (d) Relative positional frequency of His85 (in VH) using the abYsis portal. (e) Relative positional frequency of Glu84 (in Vk) using the abYsis portal.

## Supplementary Figure – S1

**A**

Heavy chain  
 Framework-1  
 Anti-PSMA\_wildtype RVI<sup>I68T</sup>MSVDTSKNQFSLKLSVTAADTALYYCAS  
 IGHV4-39\*01 RVTISVDTSKNQFSLKLSVTAADTAVYYCAR  
 Anti-PSMA\_variant1 RVTISVDTSKNQFSLKLSVTAADTALYYCAS

**B**

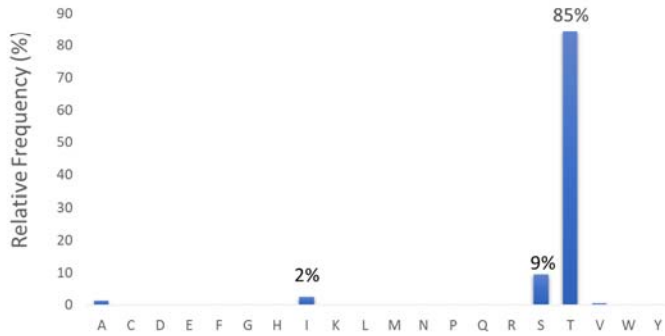

**C**

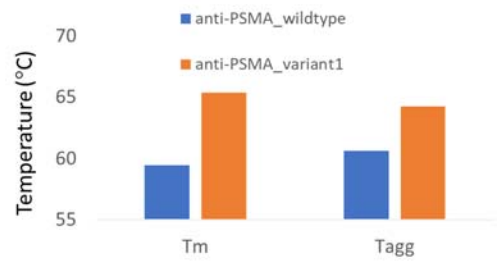

## Supplementary Figure – S2

**A**

**Heavy chain\_Framework-3**

|                        |                                               |
|------------------------|-----------------------------------------------|
| ANTI-DLL3_HC           | RFTISRENVKHSLYLQMNSLRVGD <del>T</del> AVYFCAR |
| IGHV3-13*05            | RFTISRENAKNSLYLQMNSLRAGDTAVYYCAR              |
| ANTI-DLL3_variant-1_HC | RFTISRENVKNSLYLQMNSLRVGD <del>T</del> AVYFCAR |
| ANTI-DLL3_variant-2_HC | RFTISRENVKNSLYLQMNSLRVGD <del>T</del> AVYFCAR |
| ANTI-DLL3_variant-3_HC | RFTISRENVKHSLYLQMNSLRVGD <del>T</del> AVYFCAR |

**Light chain\_Framework-3**

|                        |                                               |
|------------------------|-----------------------------------------------|
| ANTI-DLL3_LC           | GVPSRFSGSGSSETEFTLTISLQPD <del>D</del> FATYYC |
| IGKV1-5*03             | GVPSRFSGSGSGTEFTLTISLQPD <del>D</del> FATYYC  |
| ANTI-DLL3_variant-1-LC | GVPSRFSGSGSSETEFTLTISLQPD <del>D</del> FATYYC |
| ANTI-DLL3_variant-2-LC | GVPSRFSGSGSGTEFTLTISLQPD <del>D</del> FATYYC  |
| ANTI-DLL3_variant-3-LC | GVPSRFSGSGSGTEFTLTISLQPD <del>D</del> FATYYC  |

**B**

| # | Name                    | Heavy chain  | Light chain  |
|---|-------------------------|--------------|--------------|
| 1 | Anti-DLL3-wildtype      | DLL3_HC      | DLL3_LC      |
| 2 | Anti-DLL3-variant1 (V1) | DLL3_HC_H85N | DLL3_LC      |
| 3 | Anti-DLL3-variant2 (V2) | DLL3_HC_H85N | DLL3_LC_E84G |
| 4 | Anti-DLL3-variant3 (V3) | DLL3_HC      | DLL3_LC_E84G |

**C**

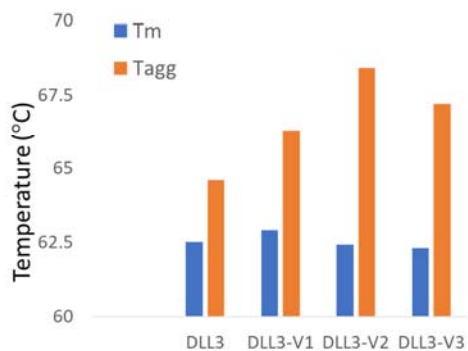

**D**

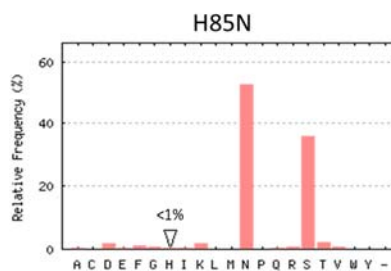

**E**

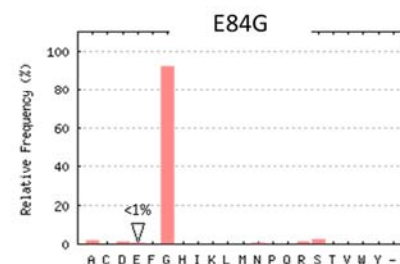

Supplement: 41598_2020_66636_MOESM1_ESM.pdf [file 41598_2020_66636_MOESM1_ESM.pdf]
